# Supplementary material for: Dissecting the Binding Profile of PET Tracers to Corticobasal Degeneration Tau Fibrils
Source: PubMed Central journal article supplement (PMC8447187; doi:10.1021/acschemneuro.1c00536), 2021-08-31
Supplement: cn1c00536_si_001.pdf [file cn1c00536_si_001.pdf]

# Supporting Information

## Dissecting the Binding Profile of PET Tracers to Corticobasal Degeneration tau Fibrils

Yang Zhou<sup>1,#</sup>, Junhao Li<sup>1,#</sup>, Agneta Nordberg<sup>2,3</sup>, Hans Ågren<sup>1\*</sup>

<sup>1</sup> *Department of Physics and Astronomy, Uppsala University, Box 516, SE-751 20 Uppsala, Sweden*

<sup>2</sup> *Division of Clinical Geriatrics, Center for Alzheimer Research, Department of Neurobiology, Care Sciences and Society, Karolinska Institutet, 141 84, Stockholm, Sweden*

<sup>3</sup> *Theme Aging Karolinska University Hospital, S-141 86, Stockholm, Sweden*

# These authors contributed equally.

\* Corresponding author: Hans Ågren

**Email:** [hans.agren@physics.uu.se](mailto:hans.agren@physics.uu.se)

**Keywords:** corticobasal degeneration; metadynamics; positron emission tomography tracer; free energy surface; Alzheimer disease; binding profile

**This PDF file includes:**

Figures S1 to S8  
Tables S1 to S3

**Figure S1.** Illustration of the workflow implemented in this study.

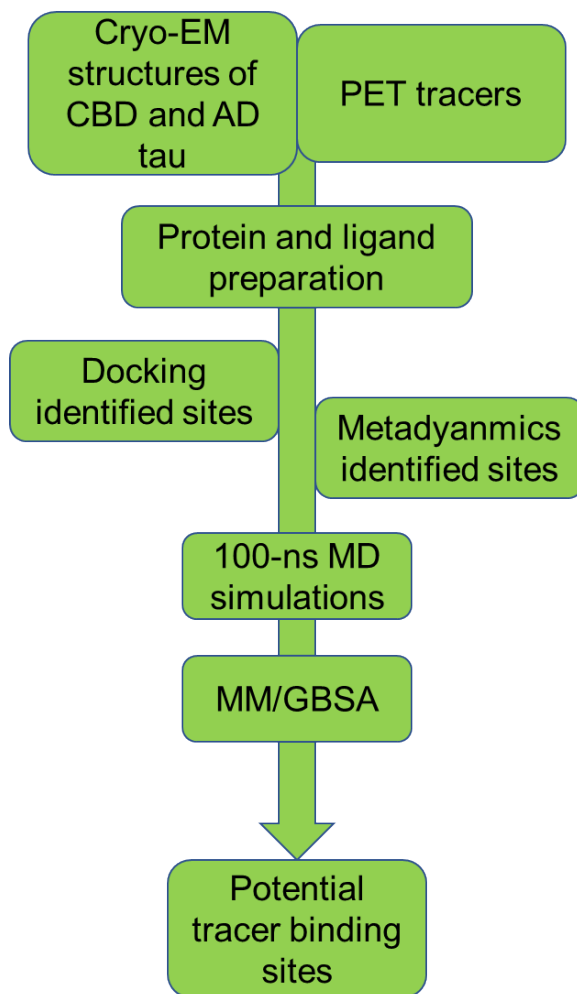

**Figure S2.** Illustration of convergence of the metadynamics simulations for the CBD tau.

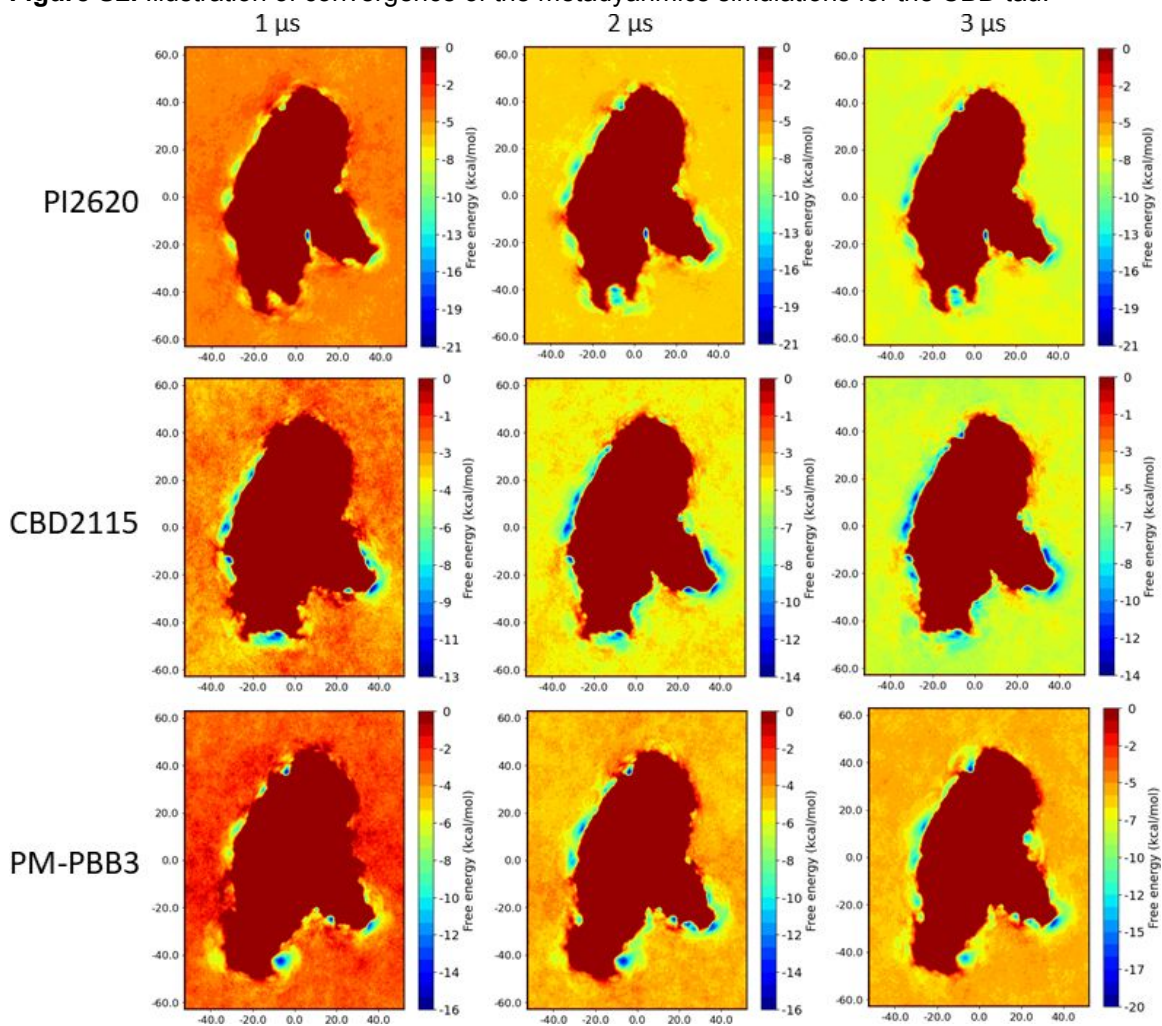

Between 2-3  $\mu$ s, no new local minimums occurred on the surface, indicating that the simulation is converged for each system.

**Figure S3.** Illustration of convergence of the metadynamics simulations for the AD tau.

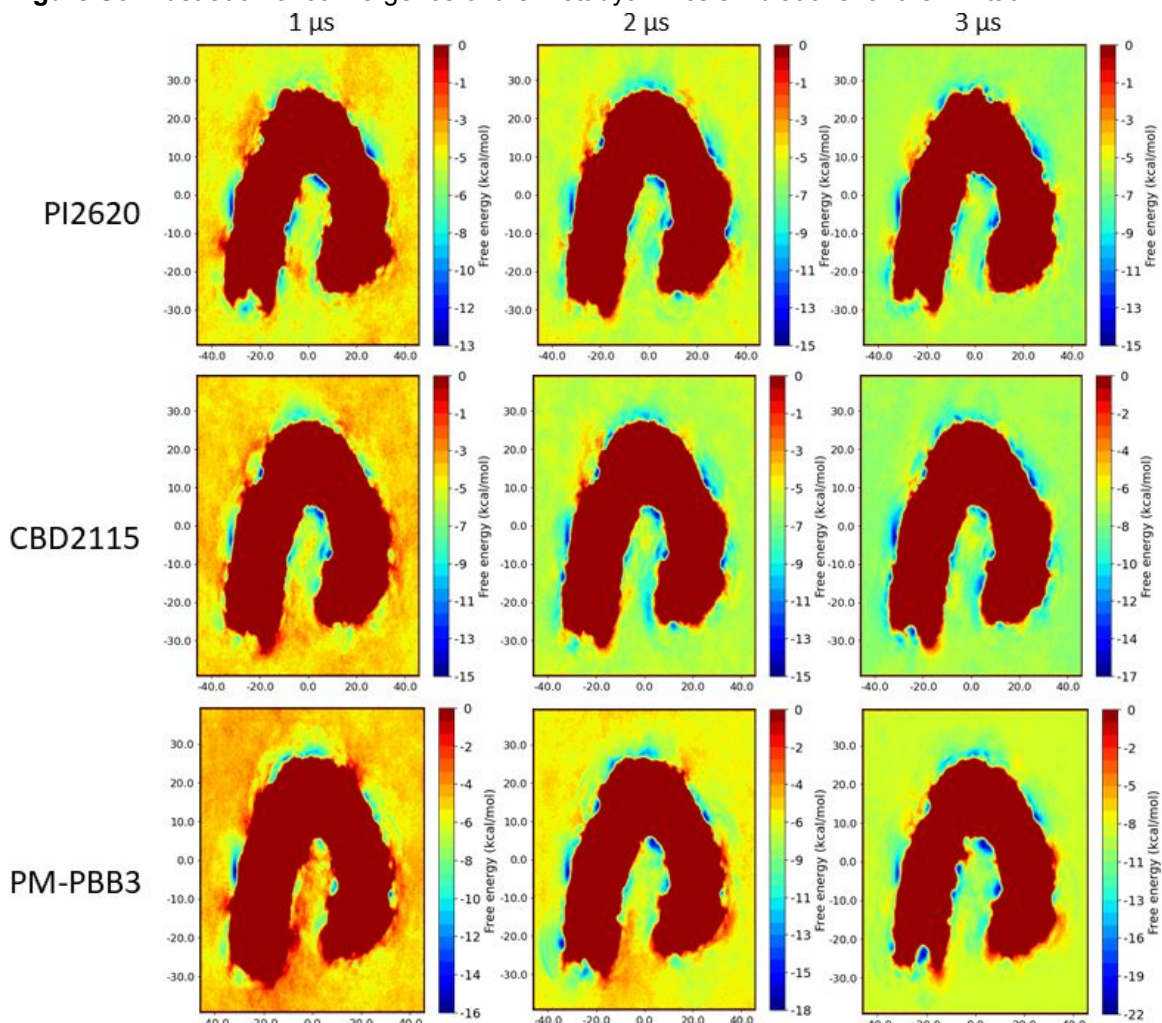

Between 2-3  $\mu$ s, no new local minimums occurred on the surface, indicating that the simulation is converged for each system.

**Figure S4.** Time evolution of hydrogen bond number for MD simulations of CBD2115-e1 system

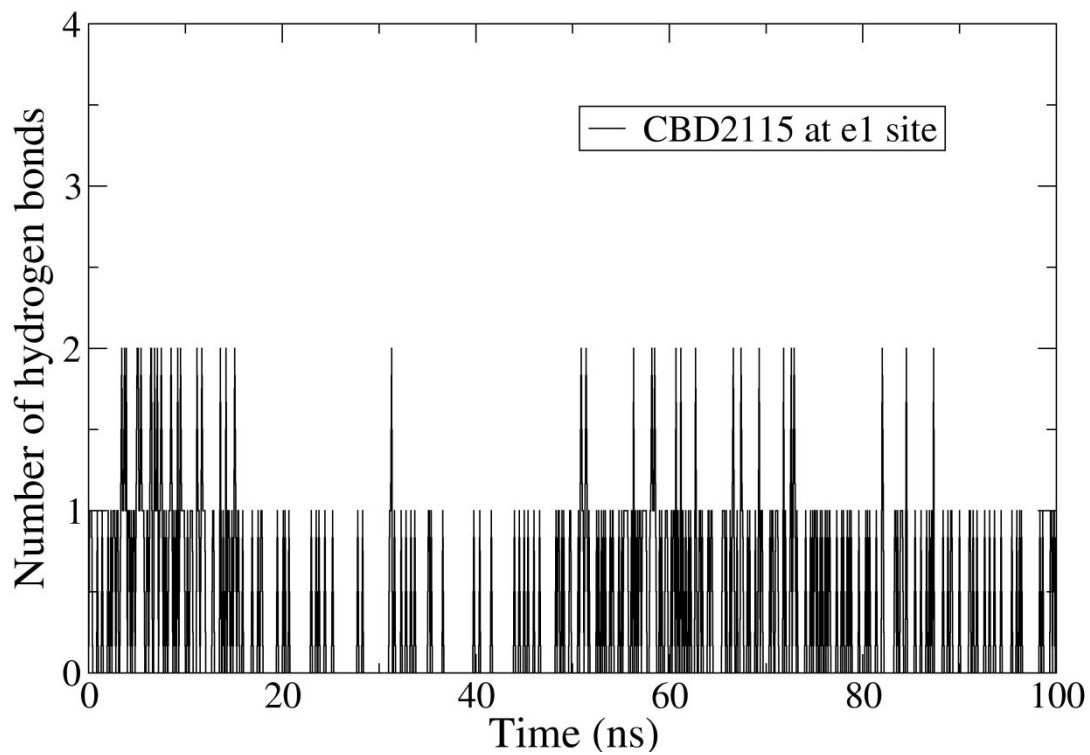

**Figure S5.** Illustration of the model used for metadynamics simulations and the collective variables selected.

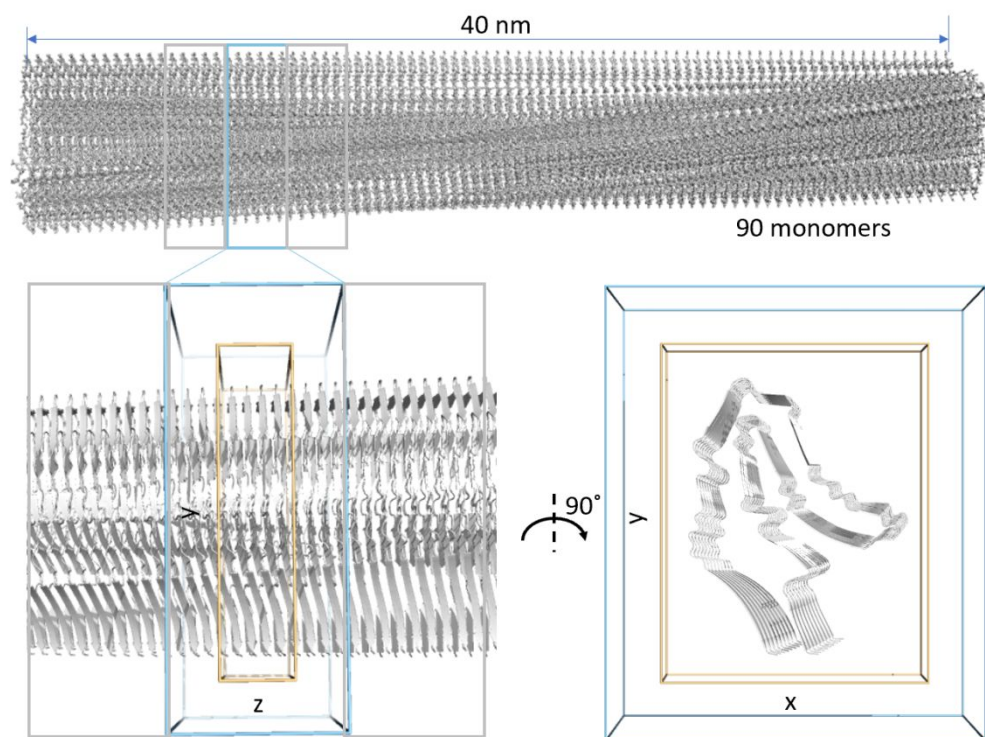



**Figure S6.** Illustration of the overlapping between experimental and theoretical models for identifying PM-PBB3 binding sites on AD tau.

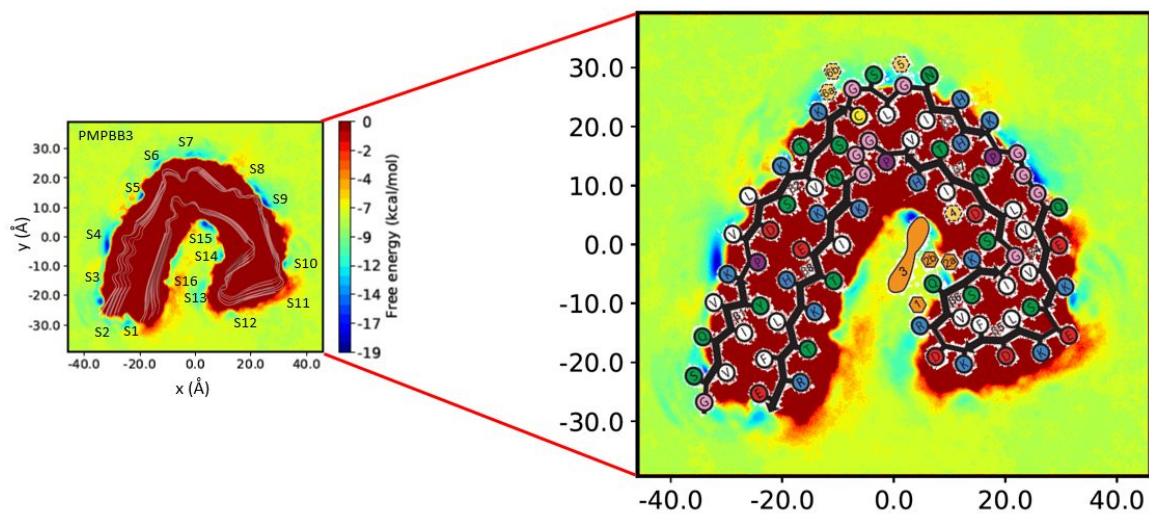

Superimpose of Fig. 1e in ref. 40 (reproduced from [*Acta Neuropathol.* **2021**, 141, 697-708]). Copyright. [2021] Springer Nature) and the Figure 4c in our study. The white pixels in the background of Fig. 1e have been replaced with transparent pixels for comparison.

**Figure S7.** Time evolution of protein C $\alpha$  RMSD for the metadynamics simulations.

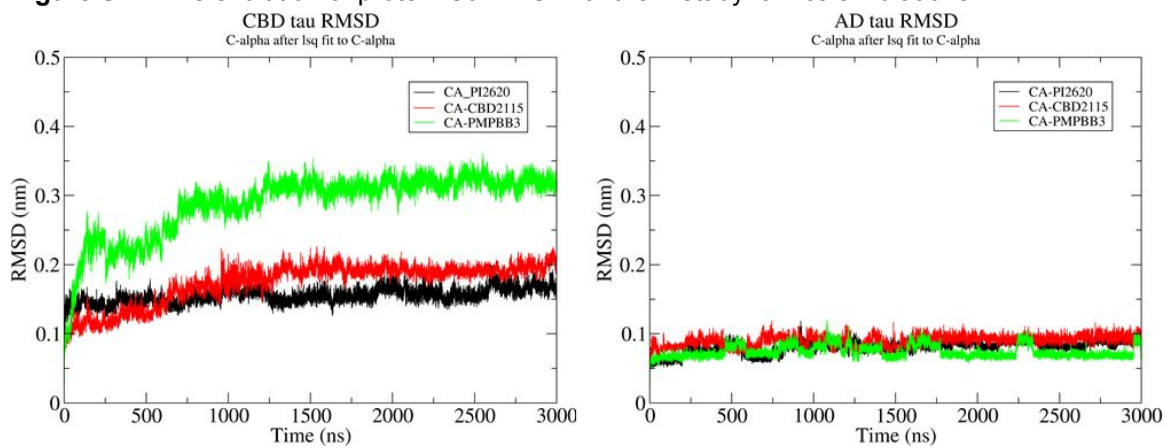



**Figure S8.** Binding free energy decomposition for PI2620 bound to the e1 site of CBD tau.

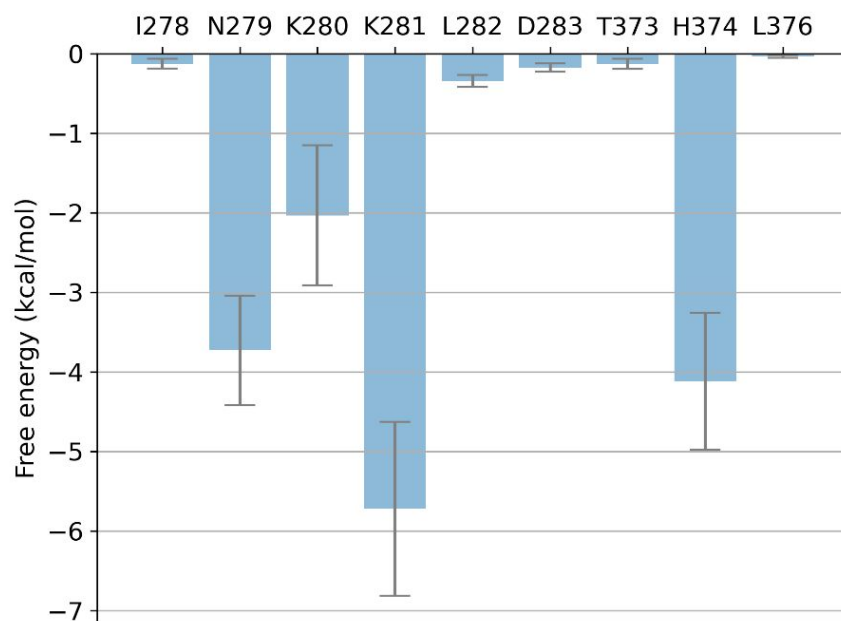

**Table S1.** Free energy differences for tracers binding to CBD tau from metadynamics simulations (kcal/mol).

| Site | PI2620             | CBD2115           | PMPBB3             |
|------|--------------------|-------------------|--------------------|
| S1   | <b>-7.5 ± 0.2</b>  | -5.1 ± 0.1        | <b>-7.1 ± 0.0</b>  |
| S2   | -6.4 ± 0.2         | -5.7 ± 0.0        | -6.0 ± 0.1         |
| S3   | -1.9 ± 0.1         | -5.7 ± 0.2        | -4.1 ± 0.0         |
| S4   | -3.8 ± 0.1         | -5.4 ± 0.1        | -5.3 ± 0.0         |
| S5   | -6.6 ± 0.0         | <b>-7.7 ± 0.1</b> | <b>-7.8 ± 0.1</b>  |
| S6   | <b>-7.1 ± 0.1</b>  | -6.3 ± 0.2        | <b>-7.4 ± 0.2</b>  |
| S7   | -3.3 ± 0.2         | -6.6 ± 0.1        | -2.7 ± 0.1         |
| S8   | -6.3 ± 0.7         | -6.6 ± 0.2        | <b>-10.2 ± 0.1</b> |
| S9   | -3.3 ± 0.1         | -6.5 ± 0.1        | -5.1 ± 0.2         |
| S10  | -6.1 ± 0.1         | -6.5 ± 0.2        | <b>-9.3 ± 0.2</b>  |
| S11  | -1.6 ± 0.0         | -6.1 ± 0.0        | -6.4 ± 0.2         |
| S12  | <b>-11.4 ± 0.4</b> | -                 | -1.4 ± 0.1         |

**Table S2.** Docking scores of the tracers at E1, S4, and S14 (kcal/mol).

|         | E1    | S4   | S14  |
|---------|-------|------|------|
| MK6240  | -9.2  | -4.9 | -6.0 |
| PI2620  | -8.8  | -5.4 | -6.5 |
| CBD2115 | -8.5  | -6.4 | -6.8 |
| PMPBB3  | -10.6 | -4.8 | -7.0 |

**Table S3.** Free energy differences for tracers binding to AD tau from metadynamics simulations (kcal/mol).

| Site | PI2620            | CBD2115           | PMPBB3            |
|------|-------------------|-------------------|-------------------|
| S1   | <b>-6.3 ± 0.1</b> | -0.7 ± 0.1        | <b>-7.9 ± 0.2</b> |
| S2   | -4.0 ± 0.2        | -2.0 ± 0.1        | -                 |
| S3   | -4.8 ± 0.4        | -3.8 ± 0.1        | -4.0 ± 0.2        |
| S4   | -4.0 ± 0.3        | <b>-7.9 ± 0.1</b> | <b>-6.8 ± 0.1</b> |
| S5   | -5.6 ± 0.3        | -3.7 ± 0.3        | -5.2 ± 0.2        |
| S6   | -3.7 ± 0.1        | -3.3 ± 0.2        | -1.9 ± 0.2        |
| S7   | -3.2 ± 0.5        | -3.9 ± 0.1        | -4.7 ± 0.0        |
| S8   | -4.2 ± 0.1        | -                 | -3.0 ± 0.4        |
| S9   | -5.2 ± 0.3        | -5.7 ± 0.1        | <b>-6.7 ± 0.1</b> |
| S10  | -5.3 ± 0.1        | -4.4 ± 0.1        | -                 |
| S11  | -4.1 ± 0.3        | <b>-6.7 ± 0.1</b> | -                 |
| S12  | -3.5 ± 0.1        | -1.2 ± 0.2        | -                 |
| S13  | -5.6 ± 0.1        | -3.7 ± 0.1        | -1.0 ± 0.1        |
| S14  | -5.0 ± 0.1        | -5.4 ± 0.2        | <b>-6.5 ± 0.2</b> |
| S15  | <b>-6.5 ± 0.1</b> | <b>-6.2 ± 0.1</b> | <b>-7.6 ± 0.1</b> |
| S16  | -4.6 ± 0.1        | -5.0 ± 0.1        | -4.7 ± 0.2        |
